# Supplementary material for: Anopheles merus distribution and TEP1 genotypes along the Kenyan coast
Source: Research Square preprint supplement (doi:10.21203/rs.3.rs-1660930/v1), 2022-05-25
Supplement: Supplementary file 1 [file 48b5f9dd92e5b3212d21d6b7.docx]

| **site** | **species** | **blood fed** | **gravid** | **half gravid** | **unfed** |
| --- | --- | --- | --- | --- | --- |
| indoor | *Anopheles_funestus* | 1 | 0 | 0 | 5 |
| *Anopheles_gambiae* | 14 | 5 | 0 | 314 |
| *Culex_spp* | 40 | 0 | 0 | 1036 |
| *other Anopheles* | 2 | 0 | 0 | 13 |
| outdoor | *Anopheles_funestus* | 4 | 1 | 0 | 56 |
| *Anopheles_gambiae* | 76 | 15 | 0 | 3602 |
| *Culex_spp* | 343 | 75 | 0 | 13144 |
| *other Anopheles* | 5 | 1 | 0 | 57 |
